# Supplementary material for: Best estimate of the planetary boundary layer height from multiple remote sensing measurements
Source: Copernicus journal article supplement (doi:10.5194/amt-18-3453-2025), 2025-07-28
Supplement: Supplementary file 1 [file amt-18-3453-2025-supplement.pdf]

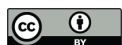

*Supplement of*

## **Best estimate of the planetary boundary layer height from multiple remote sensing measurements**

**Damao Zhang et al.**

*Correspondence to:* Damao Zhang (damao.zhang@pnnl.gov)

The copyright of individual parts of the supplement might differ from the article licence.

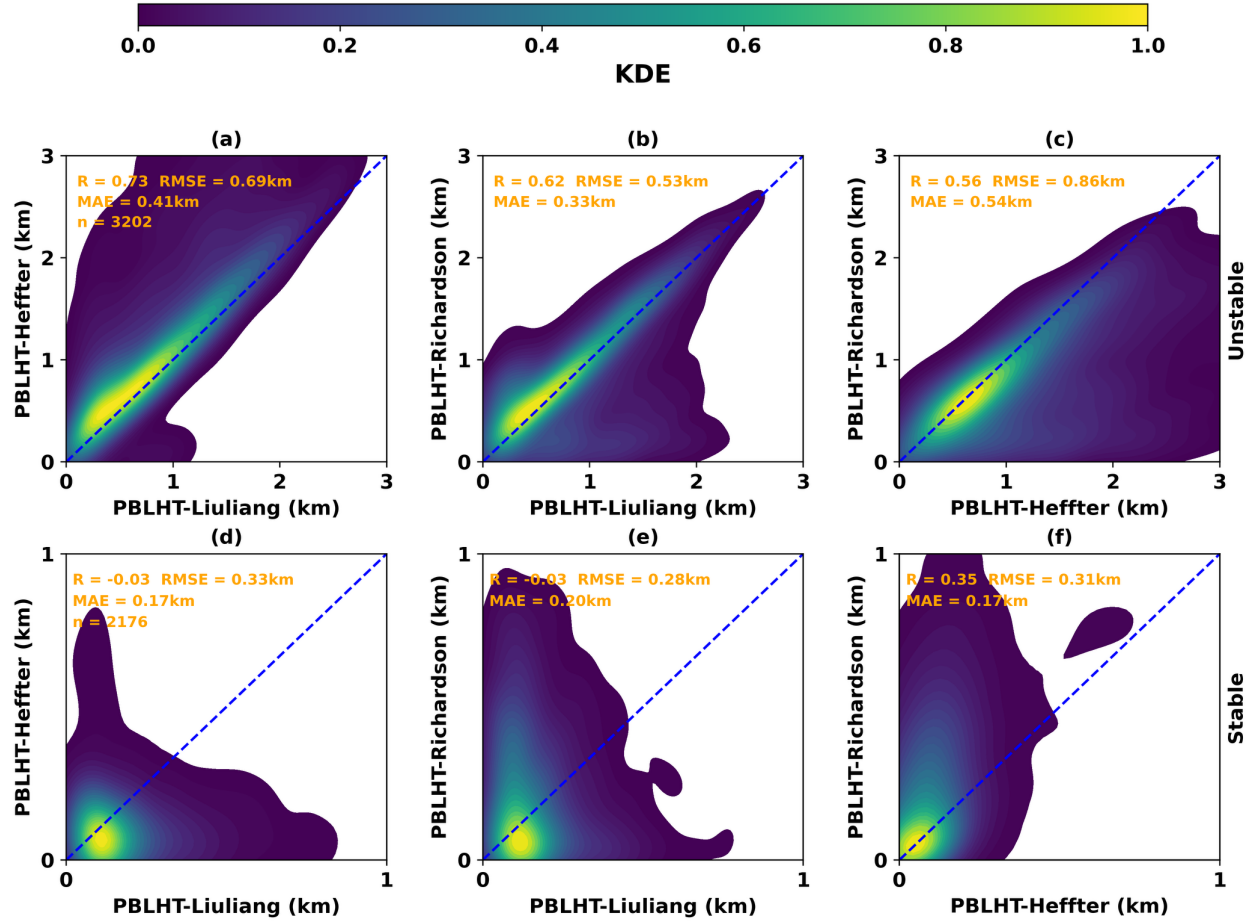

**Figure S1.** Intercomparisons of PBLHT estimates from the three methods in the PBLHT-SONDE VAP using kernel distribution estimate (KDE) under unstable (a-c) and stable (d-f) PBL conditions. R is the correlation coefficient. RMSE is the root mean square error. MAE is the mean absolute error. n is the number of samples. Since the two PBLHT estimates from the bulk Richardson method use the same approach but with different  $Ri_c$  values, only the estimate with  $Ri_c$  value of 0.25 is used.

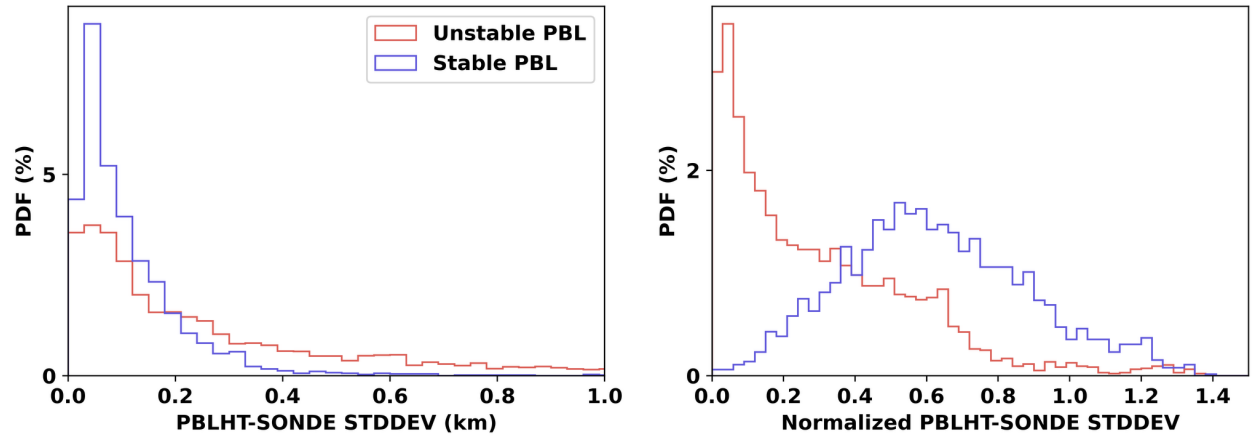

**Figure S2.** Probability Distribution Functions (PDFs) of (a) standard deviation and (b) normalized standard deviation with their mean values among the PBLHT estimates from the three methods in the PBLHT-SONDE VAP under both unstable and stable PBL conditions.

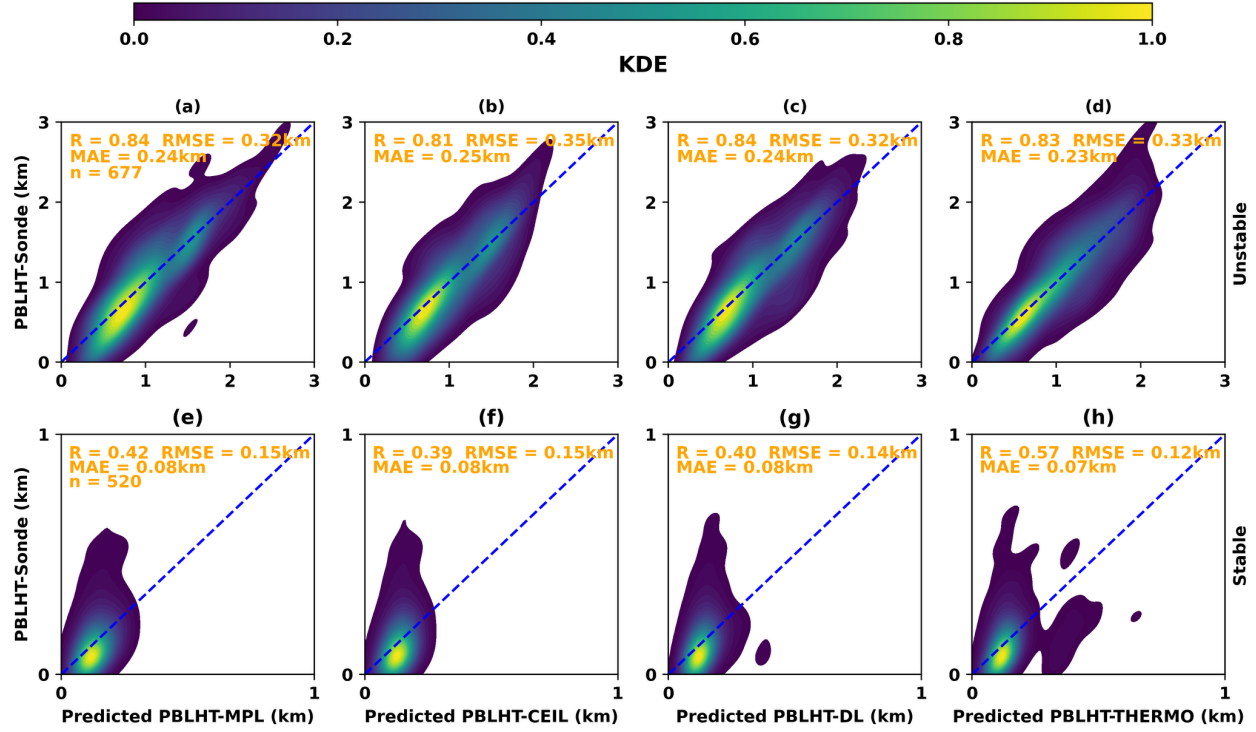

**Figure S3.** Similar as Figure S1, but for comparisons of predicted PBLHT using a Random Forest Regressor model based on individual remote sensing PBLHT estimates of: (a and e) PBLHT-MPL; (b and f) PBLHT-CEIL; (c and g) PBLHT-DL; and (d and h) PBLHT-THERMO under unstable and stable PBLH conditions.

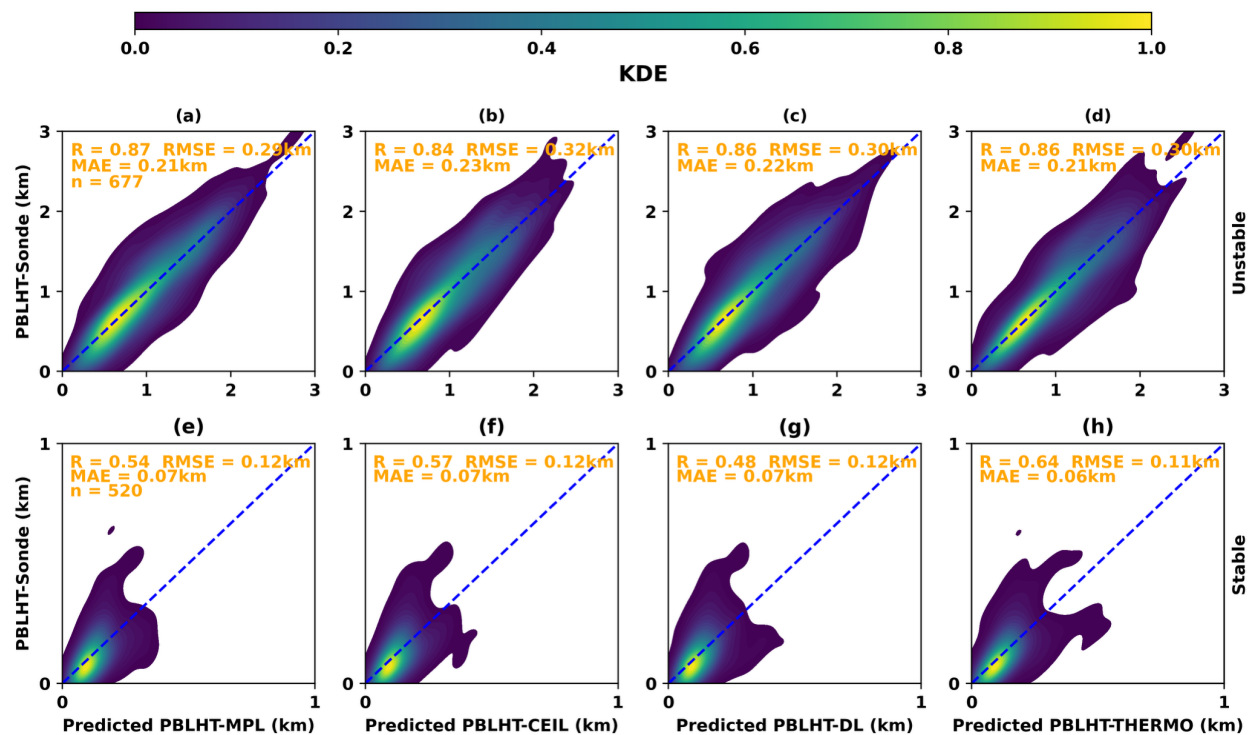

**Figure S4.** Similar as Figure S3, but for using the LightGBM model.

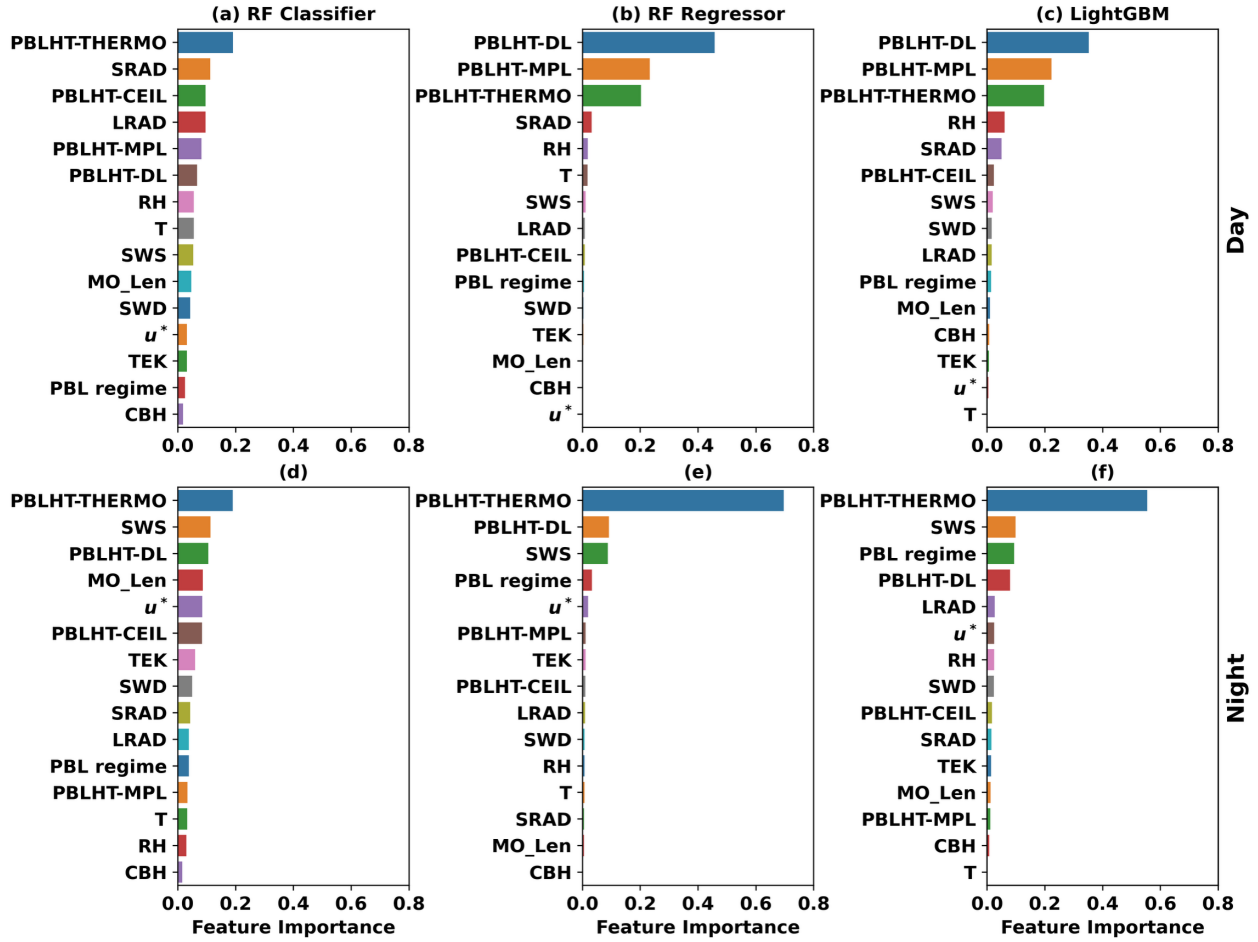

**Figure S5.** Feature importance for the three ML models at the training stage: a) and d) RF Classifier; b) and e) RF Regressor; c) and f) LightGBM during day (upper panels) and night (bottom panels) time periods. Feature importance scores are normalized so that they sum up to 1.

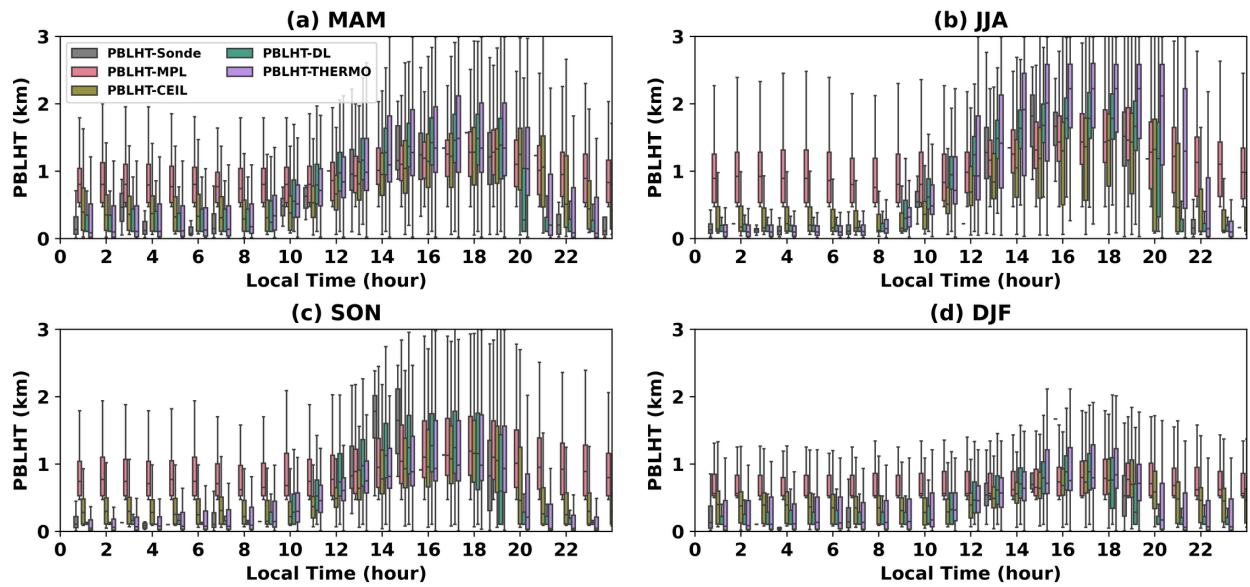

**Figure S6.** PBLHT diurnal cycles and their seasonal variations from PBLHT-MPL, PBLHT-CEIL, PBLHT-DL, PBLHT-THERMOD, and PBLHT-Sonde at the ARM SGP observatory. MAM (March-April-May) represents the Spring season, JJA (Jun-July-August) for Summer, SON (September-October-November) for Fall, and DJF (December-January-February) for Winter. Horizontal bars, boxes and whiskers represent the median, interquartile range and range of the data.

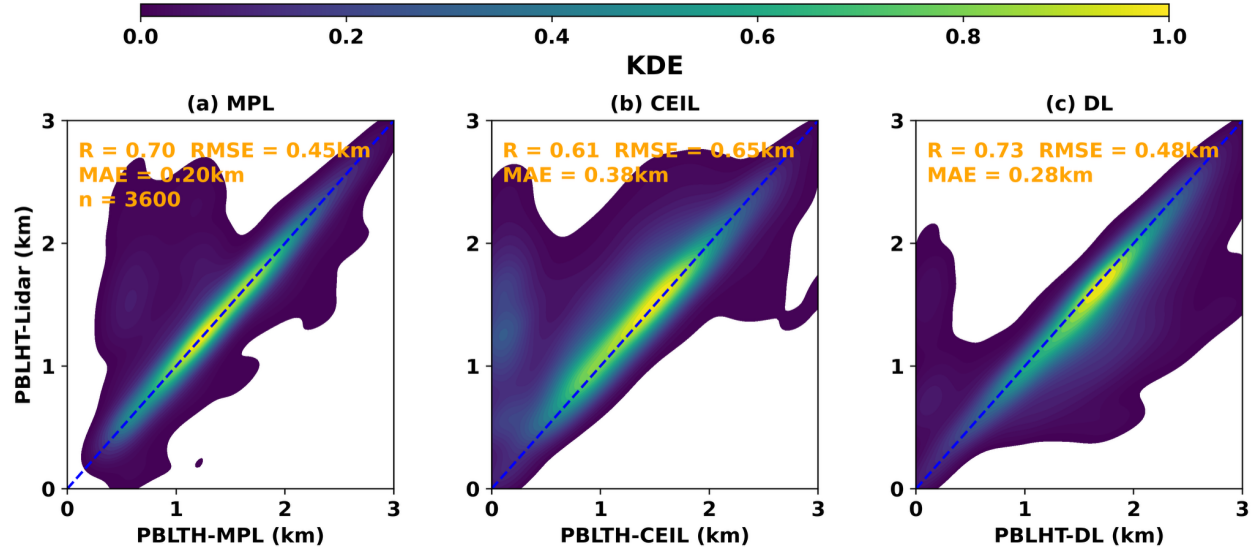

**Figure S7.** Similar as Figure S1, but for comparisons of (a) PBLHT-MPL; (b) PBLHT-CEIL; and (c) PBLHT-DL against PBLHT-Lidar under afternoon convective PBL conditions between 14:00 and 18:00 local time during summer and fall at the ARM SGP site. PBLHT-Lidar is derived as the median value among PBLHT-MPL, PBLHT-CEIL, and PBLHT-DL.
